1 **Minimum Dietary Diversity and Associated Factors among Lactating Mothers in Ataye**  
2 **District, North Shoa Zone, Central Ethiopia: A Community-based Cross-sectional Study**

3 Lemma Getacher<sup>1\*</sup>, Gudina Egata<sup>2</sup>, Tadesse Alemayehu<sup>2</sup>, Agegnehu Bante<sup>3</sup>, and Abebaw  
4 Molla<sup>4</sup>

5 <sup>1</sup>Department of Public Health, College of Health Sciences, Debre Berhan University, Debre  
6 Berhan, Ethiopia

7 <sup>2</sup>School of Public Health, College of Health and Medical Sciences, Haramaya University, Harar,  
8 Ethiopia

9 <sup>3</sup>Departments of Nursing, College of Medicine and Health Sciences, Arba Minch University,  
10 Arba Minch, Ethiopia

11 <sup>4</sup>Department of Nursing, College of Medicine and Health Sciences, Mizan Tepi University,  
12 Mizan Tepi, Ethiopia

13 \*Corresponding Author E-mail: [lemmagetacher@gmail.com](mailto:lemmagetacher@gmail.com)

14 **Institutional email:** [lemmagetacher@dbu.edu.et](mailto:lemmagetacher@dbu.edu.et)

15 **Abstract**

16 **Background:** Low dietary diversity superimposed with poor quality monotonous diets is a  
17 major problem that often results in undernutrition, mainly micronutrient deficiencies. However,  
18 there is limited evidence on minimum dietary diversity and associated factors among lactating  
19 mothers in resource-poor settings, including the study area. Therefore, the objective of the study  
20 is to assess the prevalence of minimum dietary diversity and associated factors among lactating  
21 mothers in Ataye District, Ethiopia.

22 **Methods:** A community-based cross-sectional study design was used among 652 lactating  
23 mothers aged 15-49 years from January 25 to April 30, 2018. Dietary diversity was measured

24 by the minimum dietary diversity indicator for women (MDD-W) using the 24-hour dietary  
25 recall method. Data were entered into EpiData version 4.2.0.0 and exported to the statistical  
26 package for social science (SPSS) version 24 for analysis using the logistic regression model.

27 **Results:** The prevalence of minimum dietary diversity among lactating mothers was 48.8%,  
28 (95% CI: (44.7%, 52.9%). Having formal education [(AOR=2.16, 95% CL: (1.14, 4.09)], a final  
29 say on household purchases [(AOR=5.39, 95% CI: (2.34, 12.42)], home gardening practices [  
30 (AOR=2.67, 95% CI: (1.49, 4.81)], a history of illness [(AOR=0.47, 95% CI: (0.26, 0.85), good  
31 knowledge of nutrition [(AOR=5.11, 95% CI: (2.68, 9.78)], being from food-secure households  
32 [(AOR=2.96, 95% CI: (1.45, 6.07)] and medium [(AOR=5.94, 95% CI: (2.82, 12.87)] and rich  
33 wealth indices [(AOR= 3.55, 95% CI: (1.76, 7.13)] were significantly associated with minimum  
34 dietary diversity.

35 **Conclusion:** The prevalence of minimum dietary diversity among lactating mothers was low in  
36 the study area. It was significantly associated with mothers having a formal education, final say  
37 on the household purchase, home garden, good knowledge of nutrition, history of illness, food-  
38 secure households and belonging to medium and rich household wealth indices. Therefore,  
39 efforts should be made to improve the mothers decision-making autonomy, nutrition knowledge,  
40 household food security and wealth status.

41 **Keywords:** Ataye District, Minimum Dietary Diversity, Ethiopia, Lactating Mothers

## 42 **1. Background**

43 Appropriate and adequate maternal nutrition is a pivotal public health issue in resource-poor  
44 countries throughout the globe, particularly in Africa, Southeast Asia, Latin America, and the  
45 Caribbean. Women of reproductive age (WRA) are often nutritionally vulnerable, especially  
46 lactating mothers [1]. Lactating mothers, particularly those who live in low-and middle-income

47 countries, are vulnerable to malnutrition due to increased physiological demand, lactogenesis  
48 process, eating undiversified monotonous diet and increased nutrient needs during lactation.  
49 Nutritional requirements during lactation are greater than during pregnancy, and they need at  
50 least two extra meals per day. When these needs are not met, mothers may suffer from  
51 malnutrition especially, from micronutrient deficiencies. To prevent and correct nutritional  
52 vulnerability in women of reproductive age, especially during the most 1000 critical days, one  
53 of the best nutritional interventions is dietary diversification. Dietary diversity (DD) refers to an  
54 increase in the variety of foods across and within food groups capable of ensuring adequate  
55 intake of essential nutrients that can promote good health, physical and mental development of  
56 women. Moreover, it is a qualitative measure of food consumption that reflects household access  
57 to a variety of foods and is also a proxy for the micronutrient adequacy diet of individuals [2-  
58 6].

59 Micronutrient deficiency (aka hidden hunger) is one form of undernutrition that occurs due to  
60 insufficient intake, poor knowledge about nutrition, inadequate dietary diversity or sufficient  
61 intake combined with impaired absorption due to infection, disease or inflammation and  
62 phytates (anti-nutrients) that can decrease the bioavailability of nutrients such as minerals [7].  
63 The eleven micronutrients that are the most important nutrients during lactation are vitamin A,  
64 vitamin C, thiamine, riboflavin, niacin, vitamin B6, folate, vitamin B12, calcium, iron, and zinc.  
65 Undiversified diet during lactation leads to these important micronutrients being low in breast  
66 milk and reflects the poor nutritional status and inadequate dietary intake of micronutrients [2,  
67 8-10].

68 Low dietary diversity is one of the most important causes of both macronutrient and  
69 micronutrient deficiencies [2, 13]. Studies conducted in some Asian countries showed that low  
70 dietary diversity ranges from 55.2% to 87.8% [14, 15], whereas in African country studies, low

71 dietary diversity ranges from 42.1% to 88.7% [13, 16, 17]. In Ethiopia, the low dietary diversity  
72 ranges from 56.4% to 99.9% [15, 18-20].

73 The major causes of inadequate dietary diversity stem from wider contextual factors such as  
74 lack of education, poor socioeconomic status, cultural beliefs, poor agricultural practices,  
75 poverty, disparities in households and food insecurity. Low dietary diversity has both short-term  
76 consequences, such as mortality, morbidity, disability and long-term consequences, such as  
77 stunting, impaired cognitive ability, poor economic productivity, poor reproductive  
78 performance, increased metabolic and cardiovascular diseases, and intergenerational  
79 consequences. Hence, the consequences of micronutrient malnutrition not affect only the health  
80 and survival of women but also their children [7, 11].

81 The three main strategies that have been documented for the prevention and control of hidden  
82 hunger are short-term supplementation, medium-term food fortification and a long-term focus  
83 on dietary diversification [21]. According to different scientific pieces of evidence, there is a  
84 growing worldwide consensus to increase the dietary diversity of women (consuming more food  
85 groups), especially lactating mothers, which can help to improve their diet quality and infants.  
86 Since no single food group can contain all nutrients required for the healthy functioning and  
87 performance of the body, there is, therefore, the need for more food groups to be included in the  
88 daily diet to meet their nutrient requirements [1, 3, 9]. The government of Ethiopia also has a  
89 goal to reduce maternal undernutrition through dietary diversity intervention by launching a  
90 revised national nutrition program (NNP II) among women of reproductive age, including  
91 lactating mothers and their children in 2016 [22]. Therefore, assessing the prevalence of  
92 minimum dietary diversity and associated factors among lactating mothers is vital to improving  
93 the quality of diet taken by lactating mothers.

94 Despite having many studies done elsewhere in the globe on the prevalence of minimum dietary  
95 diversity among pregnant women and household level, there is a paucity of data concerning the  
96 nature and relative magnitude of minimum dietary diversity among lactating mothers in  
97 Ethiopia, particularly there is a lack of study in central parts of the country including the study  
98 area. In addition, most of the previous studies performed across the globe, including Ethiopia,  
99 did not use the newly recommended indicator, which is called minimum dietary diversity-  
100 women (MDD-W), except the South African study, to assess dietary diversity of mothers.  
101 Furthermore, previous studies did not address the prevalence of minimum dietary diversity at  
102 the community level using this indicator. Therefore, this study was aimed at assessing the  
103 prevalence of minimum dietary diversity and associated factors among lactating mothers in  
104 Ataye District, North Shoa Zone, Amhara Regional State, Central Ethiopia, including variables  
105 that were not included in the previous studies.

## 106 **2. Methods**

### 107 **2.1. Study setting, period and design**

108 A community-based cross-sectional study was conducted from January 25 to April 30, 2018 in  
109 Ataye District. Ataye is located 270 km away from Addis Ababa, the capital city of Ethiopia.  
110 The District has 30 kebeles (lowest administrative unit in Ethiopia). The district has seven health  
111 centers, 24 health posts, and one District hospital. The common agricultural practices in the  
112 District are *teff*, wheat, sorghum, barley, maize, peas and beans, and some vegetables, such as  
113 cabbage, potato, pumpkin, tomato, onion, carrots, and lettuce, and some fruits, such as orange,  
114 papaya, banana, and mango, were among others. Lactating mothers aged 15-49 years and lived  
115 for at least six months and above in the District during the study period were included in the  
116 study, while mothers who were not able to respond to an interview and who had an unusual

117 dietary intake in the previous 24 hours, such as feasts and celebrations, were excluded from the  
118 study.

## 119 **2.2. Sample Size Determination and Sampling Procedures**

120 The sample size was estimated using two approaches based on the objectives of the study. To  
121 determine the prevalence of minimum dietary diversity, a single population proportions formula  
122 was used with the following assumptions: the proportion of maternal dietary diversity among  
123 lactating mothers was 43.6% [20],  $Z_{\alpha/2}$  had a 95% confidence level of 1.96, a margin of error of  
124 0.05, a non-response of 10%, and a design effect of 1.5. Accordingly, the calculated sample was  
125 624. On the other hand, to assess the predictors of minimum dietary diversity using a double  
126 proportion formula considering different predictors significantly associated with the outcome  
127 variable, such as educational status, occupational status and meal frequency, were used.

128 During calculation, assumptions such as a two-sided confidence level of 95%, a margin of error  
129 of 5% and power of 80%, a 1:1 proportion of exposed to unexposed ratio, a respective odds ratio  
130 for each factor, a non-response of 10% and a design effect of 1.5 were considered using the Epi  
131 Info 7 software program, and then the calculated sample size was 647. The latter sample size  
132 was considered to increase the power of the study. However, the total number of mothers in the  
133 selected kebeles was 652. Thus, due to the nature of the cluster sampling method, all mothers  
134 were included in the selected cluster using a cluster sampling technique considering kebeles as  
135 clusters.

136 This study was conducted in two urban kebeles and four kebeles of rural in the District. The  
137 numbers of lactating mothers found in each kebele were taken from a family folder documented  
138 by the Health Extension Workers (HEWs) with respect to their household. After that, all

139 lactating mothers in randomly selected clusters were included in the study through the house-  
140 to-house visit.

### 141 **2.3. Data Collection Methods and Instruments**

142 A structured interviewer-administered questionnaire was first prepared in English and was  
143 translated to Amharic (the language spoken in the study area) for data collection and then  
144 translated back to English by an independent language expert to ensure its consistency.

145 Six female grade ten completed students who were fluent speakers in the local language were  
146 recruited to participate in data collection. Two-degree health professionals were recruited for  
147 the supervision of the data collection procedure. The data collectors underwent a community-  
148 based face-to-face interview using a structured and pretested Amharic questionnaire. The  
149 mothers were interviewed (on average 30 minutes) in a private setting inside their own house.

### 150 **2.4. Measurements**

151 In this study, the outcome variable (minimum dietary diversity) was measured by minimum  
152 dietary diversity for a woman (MDD-W), which is a dichotomous indicator/tool that has been  
153 developed by FAO. A total of 16 food groups were considered in this study (i.e. cereals, white  
154 tubers and roots, vitamin A-rich vegetables and tubers, dark green leafy vegetables, other  
155 vegetables, vitamin A-rich fruits, other fruits, organ meat, flesh meat, eggs, fish and seafood,  
156 legumes, seeds and nuts, milk and milk products, oils and fats, sweets, spices, condiments, and  
157 beverages). These food groups were further regrouped into ten food groups (i.e. all starchy  
158 staples, pulses (beans, peas, and lentils), nuts and seeds, all dairy, flesh foods (including organ  
159 meat), eggs, vitamin A-rich dark green leafy vegetables, other vitamin A-rich vegetables and  
160 fruits, other vegetables and other fruits) during analysis [3, 4].

161 The Minimum Dietary Diversity Score (MDDS) was calculated for each lactating mother during  
162 the previous 24 hours to classify mother’s dietary diversity as adequate ( $\geq 5$  food groups) or not  
163 adequate ( $< 5$  food groups) from ten food groups. Then, the outcome variable was coded as  
164 minimum dietary diversity score  $\geq 5$  food groups, as “1” and minimum dietary diversity score  
165  $< 5$  food groups as “0” for logistic regression analysis.

166 Household food insecurity was measured with the Household Food Insecurity Access Scale  
167 (HFIAS), a structured, standardized and validated tool that was developed mainly by FANTA,  
168 to classify households as food secure or not [24, 25]. A scale is to be a valid tool in measuring  
169 household food insecurity among both rural and urban areas of Ethiopia with Cronbach's alpha  
170 values of 0.76 for round 1 and 0.73 for round 2 [26]. In this study, nine standard Household  
171 Food Insecurity Access Scale (HFIAS) questions adapted from FANTA were computed. All  
172 “Yes” responses were coded “1” and “No” responses were coded “0”, and the responses were  
173 summed to obtain the household food insecurity status. The HFI status, which had a high internal  
174 consistency (Cronbach’s alpha = 0.927), was further dichotomized as “food secure” and “food  
175 insecure households which coded as “1” and as “0”, respectively, during analysis. Furthermore,  
176 the household wealth index was analyzed using principal component analysis (PCA) by using  
177 approximately 20 locally available household assets considering the assumptions.

178 The knowledge of mothers about nutrition was computed based on six questions that included  
179 awareness of the mothers about nutrition and dietary diversity practice. The mothers who scored  
180 above the mean cut-off point were considered to have good knowledge and coded as “1”,  
181 whereas those who scored below this cut-off point were considered to have poor knowledge  
182 and coded as “0”.

## 183 **2.5. Data Quality Control**



184 The adapted and further developed English language questionnaire was translated and  
185 contextualized into the Amharic language by an Amharic language speaker who has attended a  
186 Master of Arts in the Amharic language. It was translated back to the English language by a  
187 person who attended Master of Arts in the English language, and comparison was made on the  
188 consistency of the two versions. Data were collected using the translated and pretested Amharic  
189 version structured questionnaire. The questionnaire was modified further after a pretest was  
190 conducted. During data collection, the interviewers informed mothers about all the details of the  
191 research. The mothers were encouraged to feel free and told that the confidentiality of their  
192 responses was assured and that no information was shared with anybody without the  
193 investigator. After this, women who were willing to participate and signed the informed consent  
194 document were interviewed.

195 Two days of training (both theoretical and practical) was given for six female grade ten  
196 completed students and the two supervisors. The training was focused on interview technique,  
197 ethical issues, rights of the participants, reading through all the questions and understanding  
198 them and ways of decreasing under/over-reporting and maintaining confidentiality.

199 Three weeks before the actual data collection, the questionnaire was pretested outside to the  
200 selected kebele on 5% of the total sample size to ensure the validity of the tool. After the pretest  
201 was performed, all the necessary adjustments were made. To minimize bias, interviews were  
202 conducted in an area with adequate confidentiality, privacy and without the involvement of any  
203 other person other than the respondent. On-site supervision was carried out during the whole  
204 period of data collected daily by the supervisors and principal investigators. At the end of each  
205 day, questionnaires were reviewed and cross-checked for completeness, accuracy, and

206 consistency by the supervisor and principal investigator, and in the end, corrective measures  
207 were taken.

## 208 **2.6. Statistical Analysis**

209 All the interviewed questionnaires were checked visually by the principal investigator. Data  
210 were coded, entered and cleaned using EpiData version 4.2.0.0 software. Double data entry was  
211 performed by two data clerks to cross-check the data for completeness before analysis. The  
212 entered data were exported and analyzed with Statistical Package for Social Science (SPSS)  
213 version 24 software. Simple descriptive statistics, such as simple frequency distribution,  
214 measures of central tendency, measures of variability and percentages, were performed to  
215 describe the demographic, socioeconomic, and maternal-related characteristics of the  
216 respondents. Then, the information was presented using tables and figures. The continuous  
217 variables were tested for normal distribution using a histogram, Q-Q plot and some statistical  
218 tests such as Kolmogorov-Smirnov and Shapiro-Wilk tests.

219 Bivariable analysis and crude odds ratio along with a 95% confidence interval (CI) were used  
220 to see the association between each independent variable and the outcome variable by using  
221 binary logistic regression. Independent variables with a p-value of  $\leq 0.25$  were included in the  
222 multivariable analysis to control for confounding factors. Multicollinearity was checked to see  
223 the linear correlation among the independent variables by using standard error (SE). Variables  
224 with a standard error of  $\geq 2$  were dropped from the multivariable analysis. The fitness of the  
225 model was tested by Hosmer-Lemeshow's goodness-of-fit test model coefficient with an enter  
226 method, which was found to be insignificant with a large P-value ( $P=0.374$ ) and the Omnibus  
227 tests were significant ( $P=0.0001$ ). The adjusted odds ratio along with 95% CI was estimated to  
228 identify the factors associated with dietary diversity using multivariable logistic regression

229 analysis. All tests were two-sided, and the level of statistical significance was declared at a p-  
230 value less than 0.05.

231 The ethical approval letter was obtained from Haramaya University, College of Health and  
232 Medical Science Institutional Health Research Ethics Review Committee (IHRERC). The  
233 approval letter was dated 15 January 2018 and numbered Ref C/AC/R/D/897/18. Before  
234 informed consent was obtained, a clear description of the study title, purpose, procedure,  
235 duration, possible risks and benefits of the study was explained for each study participant. Their  
236 rights during the interview were guaranteed. Then written and signed informed consent was  
237 obtained from each respondent before starting the interview. Questionnaire code numbers were  
238 used to maintain the confidentiality of information gathered from each study participant  
239 throughout the study.

### 240 **3. Results**

#### 241 **3.1. Sociodemographic Characteristics of Study Participants**

242 Out of 652 planned lactating mothers, 631 of them aged 15-49 years participated in a response  
243 rate of 96.8%. The mean age ( $\pm$  SD) of lactating mothers was 30.48 ( $\pm$ 6.36) years. From the  
244 total of participating, respondents, 417 (66.1%) were rural by residence, 345 (54.7%) were in  
245 the age group 15-30, 545 (86.4%) were Orthodox Christian by religion, 566 (89.7%) were  
246 Amhara by ethnicity and 501 (79.1%) were married by their marital status (Table 1).

247 Table 1: Sociodemographic characteristics of lactating mothers in Ataye District, Central  
248 Ethiopia, 2018 (n = 631)

| Variables | Frequency | Percentage |
|-----------|-----------|------------|
|-----------|-----------|------------|

---

| <b>Residence</b>                 |     |      |
|----------------------------------|-----|------|
| Urban                            | 214 | 33.9 |
| Rural                            | 417 | 66.1 |
| <b>Age</b>                       |     |      |
| 15-30                            | 345 | 54.7 |
| 31-40                            | 237 | 37.6 |
| >40                              | 49  | 7.7  |
| <b>Religion</b>                  |     |      |
| Orthodox Christian               | 545 | 86.4 |
| Muslim                           | 47  | 7.4  |
| Protestant                       | 39  | 6.2  |
| <b>Ethnicity</b>                 |     |      |
| Amhara                           | 566 | 89.7 |
| Oromo                            | 49  | 7.8  |
| Tigray                           | 11  | 1.7  |
| Other*                           | 5   | 0.8  |
| <b>Maternal education status</b> |     |      |
| No formal education              | 265 | 42.0 |
| Read and write                   | 136 | 21.5 |
| Primary education                | 99  | 15.7 |
| Secondary education              | 51  | 8.1  |
| More than secondary education    | 80  | 12.7 |
| <b>Maternal occupation</b>       |     |      |

---

|                                                  |     |      |
|--------------------------------------------------|-----|------|
| Housewife                                        | 393 | 62.3 |
| Merchant                                         | 74  | 11.7 |
| Daily laborer                                    | 54  | 8.6  |
| Government employ                                | 54  | 8.6  |
| Self-employed                                    | 52  | 8.2  |
| Others**                                         | 4   | 0.6  |
| <b>Marital status</b>                            |     |      |
| Single                                           | 39  | 6.2  |
| Married                                          | 501 | 79.4 |
| Divorced                                         | 54  | 8.6  |
| Widowed                                          | 26  | 4.1  |
| Separated                                        | 11  | 1.7  |
| <b>Sex of household head</b>                     |     |      |
| Male                                             | 513 | 81.3 |
| Female                                           | 118 | 18.7 |
| <b>Maternal decision autonomy</b>                |     |      |
| Involved                                         | 384 | 60.8 |
| Not involved                                     | 250 | 39.6 |
| <b>Type of decision autonomy involved(n=384)</b> |     |      |
| Final say on household purchase                  | 331 | 86.2 |
| Final say on how to spend money                  | 184 | 29.2 |
| Other decision***                                | 15  | 2.4  |
| <b>Income-generating activities</b>              |     |      |

|                               |     |      |
|-------------------------------|-----|------|
| Yes                           | 384 | 60.8 |
| No                            | 247 | 39.2 |
| <b>Household wealth index</b> |     |      |
| Poor                          | 267 | 42.4 |
| Medium                        | 170 | 26.9 |
| Rich                          | 194 | 30.7 |

249 \*= Gurage, Argobba \*\*=student, NGO employs \*\*\*=final say on total household activity

### 250 3.2. Maternal Health-care and Feeding Practice

251 More than half of lactating mothers 354 (56.1%) had one to three frequency of ANC visits in  
 252 their previous/last pregnancy. Among those who had ANC visits, 297 (47%) delivered in the  
 253 health center and 119 (18.9%) delivered in a hospital (Table 2).

254 Table 2: Maternal healthcare and feeding practices of lactating mothers in Ataye district, Central  
 255 Ethiopia, 2018 (n = 631)

| Variables                  | Minimum Dietary Diversity |            | Frequency (%) |
|----------------------------|---------------------------|------------|---------------|
|                            | ≥5 FGs (%)                | <5 FGs (%) |               |
| <b>Number of ANC visit</b> |                           |            |               |
| No visit                   | 32 (5.1)                  | 87 (13.8)  | 119 (18.9)    |
| 1-3                        | 174 (27.6)                | 180 (28.5) | 354 (56.1)    |
| ≥4                         | 102 (16.2)                | 56 (8.8)   | 158 (25.0)    |
| <b>Place of delivery</b>   |                           |            |               |
| Home                       | 78 (12.4)                 | 137 (21.7) | 215 (34.1)    |
| Health center              | 144 (22.8)                | 153 (24.2) | 297 (47.0)    |

|                                    |            |            |            |
|------------------------------------|------------|------------|------------|
| Hospital                           | 86 (13.6)  | 33 (5.3)   | 119 (18.9) |
| <b>Postnatal follow-up</b>         |            |            |            |
| Yes                                | 189 (57.3) | 141 (42.7) | 330 (52.3) |
| No                                 | 119 (39.5) | 182 (60.5) | 301 (47.7) |
| <b>Source of food</b>              |            |            |            |
| Own production                     | 146 (23.1) | 219 (34.7) | 365 (57.8) |
| Purchasing                         | 157 (24.9) | 99 (15.7)  | 256 (40.6) |
| Food aid/relief                    | 5 (0.8)    | 3 (0.5)    | 8 (1.3)    |
| Other sources*                     | 1 (0.15)   | 1 (0.15)   | 2 (0.3)    |
| <b>Home gardening practice</b>     |            |            |            |
| Yes                                | 179 (28.4) | 81 (12.8)  | 260 (41.2) |
| No                                 | 129 (20.4) | 242 (38.4) | 371 (58.8) |
| <b>Meal frequency</b>              |            |            |            |
| Two meals only or below            | 21 (3.3)   | 32 (5.1)   | 53 (8.4)   |
| Three meals                        | 197 (31.2) | 237 (37.6) | 434 (68.8) |
| Three meals above                  | 90 (62.5)  | 54 (37.5)  | 144 (22.8) |
| <b>Illness in the last 2 weeks</b> |            |            |            |
| Yes                                | 74 (11.7)  | 169 (26.8) | 243 (38.5) |
| No                                 | 234 (37.1) | 154 (24.4) | 388 (61.5) |

256 \* = no formal source like helping from others/relatives, FGs = food groups

### 257 3.3. Minimum Dietary Diversity Score of lactating mothers

258 The prevalence of the minimum dietary diversity score ( $\geq 5$  food groups) among lactating  
 259 mothers was 48.8 (95% CI: (44.7%, 52.9%)) during the preceding 24 hours of the survey. The

260 majority of the study participants had consumed all starchy staple foods (99.4%) and pulses  
261 (beans and peas) (79.1%). The least consumed food group was other fruits (8.7%) (**Figure 1**).

### 262 **3.4. Knowledge about nutrition**

263 Regarding knowledge about nutrition, of the total participants in this study, 54.8% (95% CI:  
264 50.9, 58.5) had good knowledge of nutrition.

### 265 **3.5. Household food security status**

266 The household food security status of the study participants was 75.9%, 95% CI: (72.4, 79.3)  
267 food secure, while 24.1%, 95% CI: (20.7, 27.6) were food insecure households.

### 268 **3.6. Factors Associated with Minimum Dietary Diversity among Lactating Mothers**

269 In the bivariable logistic regression analysis model, educational status of lactating mothers,  
270 mothers who had the final say on a household purchase, mothers who had income-generating  
271 activities, increased number of ANC visits, place of delivery, postnatal follow-up, the main  
272 source of food, home gardening practice, history of illness, daily eating pattern, knowledge of  
273 nutrition, household food insecurity, and household wealth indices were significantly associated  
274 with minimum dietary diversity of mothers and became candidates for further multivariable  
275 analysis.

276 In the multivariable logistic regression analysis model, those variables with a P-value of  $\leq 0.25$   
277 in the bivariable analysis were entered into a multivariable analysis using the enter method to  
278 identify the independent predictors of the minimum dietary diversity score. After adjusting for  
279 all possible confounders, the formal educational status of mothers, maternal decision-making  
280 autonomy related to a final say on a household purchase, home gardening practice, good  
281 knowledge of nutrition, illness in the last two weeks, food-secure households and medium and



282 rich household wealth indices remained significant and independent predictors of the minimum  
283 dietary diversity score of mothers.

284 Lactating mothers who had formal education were more than two times [(AOR=2.16, 95% CL:  
285 (1.14, 4.09)] more likely to have minimum dietary diversity scores than those who had no formal  
286 education. Regarding maternal decision-making autonomy, mothers who had the final say on  
287 household purchases were more than five times [(AOR=5.39, 95% CI: (2.34, 12.42)] more likely  
288 to achieve minimum dietary diversity than their counterparts. The odds of minimum dietary  
289 diversity scores were nearly three times higher among mothers who had home gardening  
290 practice [(AOR=2.67, 95% CI: (1.49, 4.81)] than their counterparts.

291

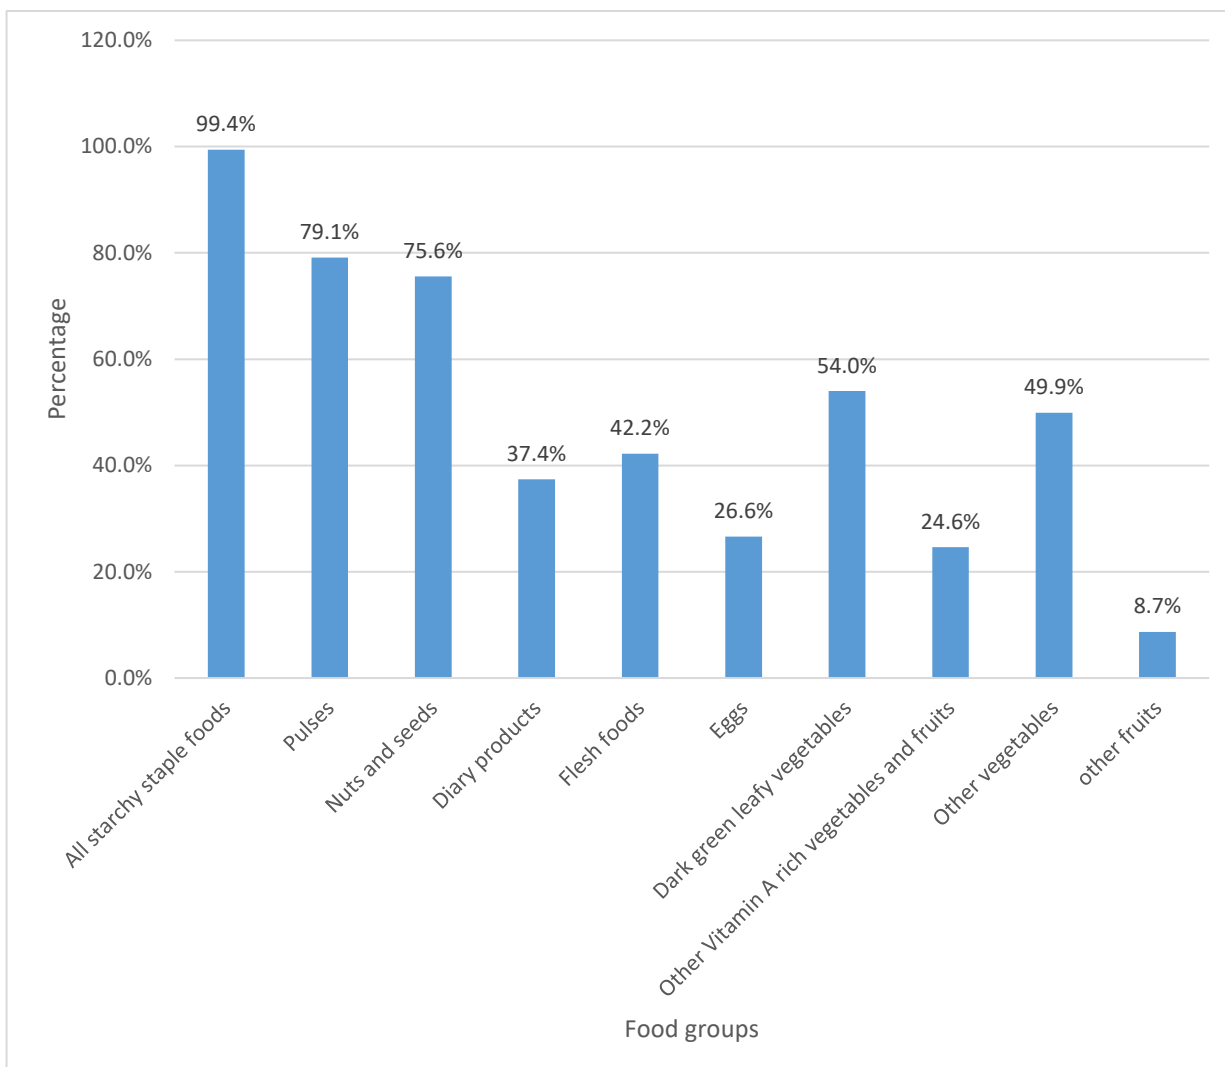

292 Figure 1: The ten grouped food groups consumed by lactating mothers in Ataye District, Central  
293 Ethiopia, 2018 (n=631)

294 Mothers who had a history of illness in the last two weeks were 53% [(AOR=0.47, 95% CI:  
295 (0.26, 0.85) less likely to reach a minimum dietary diversity score than their counterparts. The  
296 odds of minimum dietary diversity score were more than five times [(AOR=5.11, 95% CI: (2.68,  
297 9.78)] more common among mothers who had good knowledge of nutrition than those who had  
298 poor knowledge of nutrition. Food-secure households had nearly three times the minimum  
299 dietary diversity scores than food-insecure households [(AOR=2.96, 95% CI: (1.45, 6.07)].

300 Mothers from households who had medium and rich wealth indices were nearly six times and  
 301 more than three times more likely to have minimum dietary diversity experience than poor  
 302 households [(AOR=5.94, 95% CI: (2.82, 12.87)] and [(AOR= 3.55, 95% CI: (1.76, 7.13)],  
 303 respectively (Table 3).

304 Table 3: Bivariable and multivariable logistic regression<sup>1</sup> analysis of factors associated with  
 305 MDD among lactating mothers in Ataye district, Central Ethiopia, 2018 (n=631).

| Variables                                      | Minimum DD         |                    | COR (95% CI)       | AOR (95% CI)               |
|------------------------------------------------|--------------------|--------------------|--------------------|----------------------------|
|                                                | ≥5 FGs             | <5 FGs             |                    |                            |
|                                                | N <sub>0</sub> (%) | N <sub>0</sub> (%) |                    |                            |
| <b>Maternal education</b>                      |                    |                    |                    |                            |
| Formal education                               | 182(66.2)          | 93(33.8)           | 3.57(2.56,4.97) ** | <b>2.16(1.14,4.09) *</b>   |
| No formal education                            | 126(35.4)          | 230(64.6)          | 1.00               | 1.00                       |
| <b>Final say on household purchase (n=384)</b> |                    |                    |                    |                            |
| Yes                                            | 211(63.7)          | 120(36.3)          | 3.72(2.01,6.91) ** | <b>5.39(2.34,12.42) **</b> |
| No                                             | 17(32.1)           | 36(67.9)           | 1.00               | 1.00                       |
| <b>Meal frequency</b>                          |                    |                    |                    |                            |
| Two meals only or below                        | 21(39.8)           | 32(60.4)           | 1.00               | 1.00                       |
| Three meals                                    | 197(45.4)          | 237(54.6)          | 1.27(0.7,.2.27)    | 0.59(0.19,1.85)            |
| Three meals above                              | 90(62.5)           | 54(37.5)           | 2.54(1.33,4.84) *  | 0.68(0.20,2.31)            |
| <b>Income-generating activities</b>            |                    |                    |                    |                            |
| Yes                                            | 205(53.4)          | 179(46.6)          | 1.60(1.16,2.21)    | 0.56(0.26,1.22)            |
| No                                             | 103(41.7)          | 144(58.3)          | 1.00               | 1.00                       |

---

|                                  |           |           |                     |                           |
|----------------------------------|-----------|-----------|---------------------|---------------------------|
| <b>Place of delivery</b>         |           |           |                     |                           |
| Health institutions              | 230(55.2) | 187(44.8) | 2.15(1.53, 3.01) ** | 0.53(0.21,1.35)           |
| Home                             | 78(36.4)  | 136(63.6) | 1.00                | 1.00                      |
| <b>Postnatal follow-up</b>       |           |           |                     |                           |
| Yes                              | 189(57.3) | 141(42.7) | 2.05(1.49,2.82) **  | 1.56(0.81,2.99)           |
| No                               | 119(39.5) | 182(60.5) | 1.00                | 1.00                      |
| <b>Number of ANC visits</b>      |           |           |                     |                           |
| ≥4                               | 102(64.6) | 56(35.4)  | 4.95(2.94,8.33) **  | 3.32(0.85, 12.87)         |
| 1-3                              | 174(49.2) | 180(50.8) | 2.63(1.67,4.15) **  | 2.43(0.74,7.93)           |
| No visit                         | 32(26.9)  | 87(73.1)  | 1.00                | 1.00                      |
| <b>Home gardening practice</b>   |           |           |                     |                           |
| Yes                              | 179(68.2) | 81(31.2)  | 4.15(2.95,5.82) **  | <b>2.67(1.49,4.81) **</b> |
| No                               | 129(34.8) | 242(65.2) | 1.00                | 1.00                      |
| <b>Source of food</b>            |           |           |                     |                           |
| Another source                   | 162(60.9) | 104(39.1) | 1.00                | 1.00                      |
| Own source                       | 146(40.0) | 219(60.0) | 2.34(1.69,3.23) **  | 1.29(0.59,2.81)           |
| <b>History of illness</b>        |           |           |                     |                           |
| Yes                              | 74(30.5)  | 169(69.5) | 0.28(0.21,0.41)     | <b>0.47(0.26,0.85) **</b> |
| No                               | 234(60.5) | 154(39.5) | 1.00                | 1.00                      |
| <b>Knowledge about nutrition</b> |           |           |                     |                           |
| Good                             | 234(67.6) | 112(32.4) | 5.96(4.21,8.43) **  | <b>5.11(2.68,9.78) **</b> |
| Poor                             | 74(26.0)  | 211(74.0) | 1.00                | 1.00                      |
| <b>Household food insecurity</b> |           |           |                     |                           |

---

|                               |           |           |                    |                            |
|-------------------------------|-----------|-----------|--------------------|----------------------------|
| Food secure                   | 269(56.2) | 210(43.8) | 3.71(2.47,5.57) ** | <b>2.96(1.45,6.07) **</b>  |
| Food insecure                 | 39(25.7)  | 113(74.3) | 1.00               | 1.00                       |
| <b>Household wealth index</b> |           |           |                    |                            |
| Rich                          | 117(60.3) | 77(39.7)  | 3.62(2.45,5.34) ** | <b>3.55(1.76,7.13) **</b>  |
| Medium                        | 112(65.9) | 58(34.1)  | 4.59(3.04,6.94) ** | <b>5.94(2.82,12.87) **</b> |
| Poor                          | 79(29.6)  | 188(70.4) | 1.00               | 1.00                       |

306 \* = P-value < 0.05, \*\* = P-value < 0.001, CI = Confidence Interval, COR = Crude Odds Ratio,

307 AOR = Adjusted odds ratio, FGs = food groups, <sup>1</sup>Hosmer and Lemeshow test (P-value = 0.374)

#### 308 **4. Discussion**

309 In this study, approximately 48.8% of lactating mothers achieved a minimum dietary diversity  
 310 score, and they were more likely to have higher (more adequate) micronutrient intakes than  
 311 51.2% of lactating mothers who did not. This result indicated that the prevalence of minimum  
 312 dietary diversity in the study area is low. The 2016 FAO guideline recommended that all of the  
 313 mothers should achieve the minimum dietary diversity score ( $\geq 5$  food groups) to have adequate  
 314 micronutrient adequacy (3). The present study also examined the demographic and  
 315 socioeconomic characteristics, household-related characteristics, maternal healthcare and  
 316 feeding practice-related characteristics associated with minimum dietary diversity among  
 317 lactating mothers in Ataye District. Accordingly, attending formal education, having decision-  
 318 making autonomy on household purchases, having home gardening practices, having good  
 319 knowledge of nutrition, having an illness in the last two weeks, being from food secure  
 320 households and being in medium and rich household wealth indices were independent predictors  
 321 of minimum dietary diversity.

322 The prevalence of minimum dietary diversity is relatively higher than the study findings carried  
323 out elsewhere in the world such as Bangladesh (12.8%) and Vietnam (22%) [15], South Africa  
324 (25%) [16], Ghana (43.1%) [13], Aksum Town (43.6%) [20] and Jimma (32.8%) [18]. In  
325 contrast, this prevalence is lower than that in the study performed in Uganda (57.9%) [17]. This  
326 inconsistency could be due to the difference in the sample size because some of the studies were  
327 large surveys, they had a relatively large sample size (study done in Bangladesh and Vietnam)  
328 and some of the studies also had a lower sample size than the present study (study done in South  
329 Africa and Aksum). The study period and seasonal variation (since this study was done during  
330 the postharvest season) may also be another explanation for the observed discrepancy in which  
331 it can result in food security status change, while most of the previous studies had a high  
332 prevalence of food insecurity compared to the present study, which is nearly one-fourth.  
333 Methodological (measurement tool) differences may be another possible explanation because  
334 the current study uses the newly recommended indicator of ten food groups rather than the nine  
335 food groups' indicators. The feeding culture, educational status and socioeconomic status of the  
336 study participants were also other explanations for this observed variation.

337 The educational status of mothers was associated with a minimum dietary diversity score of  
338 lactating mothers. Lactating mothers who had formal education were more than two times highly  
339 dietary diversified mothers than those who had no formal education. This finding is similar to  
340 that of prior studies done in Ghana [13] and three countries (Bangladesh, Vietnam, and Ethiopia)  
341 [15]. This could be related to the fact that educated mothers may obtain sufficient information  
342 about varieties of food during their health service utilization and understanding the importance  
343 of increasing dietary diversity and meal frequency during lactation than non-educated mothers  
344 in case they would have the probability of taking a variety of food groups.

345 Minimum dietary diversity was associated with maternal decision-making autonomy practice.  
346 Mothers who had the final say on household purchase were more than five times more likely to  
347 achieve minimum DDS compared to those who had no final say on household purchases. This  
348 figure is in line with the finding of Ghana, women who had a final say were almost twice as  
349 likely to achieve a higher DD score [13]. This consistency may be because as the mother's  
350 involvement is increased in the family on a nutrition-related decision, they have the probability  
351 of purchasing and deciding on an important variety of foods for the households, their child and  
352 themselves, as a result, they may have increased diversify diets.

353 In the present study, the home gardening practice of lactating mothers was found to be an  
354 independent predictor of the minimum DDS of mothers. Lactating mothers who practice home  
355 gardening showed nearly three-fold higher likelihood of consuming highly diversified diets than  
356 their counterparts. This is comparable with the study conducted in Aksum town, Ethiopia [20],  
357 which demonstrated that home gardening was strongly associated with diet diversity. This might  
358 be because mothers from households with gardens would grow vegetables and fruits and become  
359 beneficiary from gardens to diversify their daily food intake; therefore, they may obtain  
360 additional diet options that enhance the diversity of the household's food consumption of  
361 different food groups in their diets.

362 Good maternal knowledge of nutrition predicted the minimum dietary diversity score of  
363 lactating mothers in the current study area. Mothers who scored above the mean cut-off point  
364 upon responding to nutrition and food diversity knowledge questions were more than five times  
365 more likely to achieve a minimum dietary diversity score compared to their counterparts. This  
366 result is comparable with the study done in three countries (Bangladesh, Vietnam, and Ethiopia)  
367 and Uganda [5, 17]. This may be because mothers who had increased knowledge about nutrition

368 may know the importance of varieties of foods and have a greater likelihood of taking these  
369 varieties of food groups. It could also be related to mothers getting enough nutrition and dietary  
370 diversity-related information and education when they have good access to health services  
371 during their antenatal and postnatal follow up. This helps them to increase their knowledge about  
372 varieties of food groups, and as a result, they may have adequate intake and consumption.

373 Maternal history of illness was associated with minimum DDS of mothers. Mothers who had a  
374 history of illness were 53% less likely to have the probabilities of achieving minimum DD scores  
375 when compared to their counterparts. A possible explanation could be that illness may decrease  
376 appetite and intake of the diet which in turn affects the dietary intake and dietary diversity of  
377 mothers. In addition, most of the respondents (nearly two-thirds) in the present study were rural  
378 residents and they may not receive enough health service in the nearby health facility  
379 immediately as they worsened, leading to a decrease in the minimum DDS mothers.

380 Another important predictor of the minimum dietary diversity score of mothers was household  
381 food insecurity. Lactating mothers from food-secure households had nearly three-fold higher  
382 probabilities of achieving a high level of MDDS than food-insecure households. This is  
383 supported by previous studies in three countries Bangladesh, Vietnam, and Ethiopia [15]. This  
384 could be explained in such a way that food security promotes the intake of adequate quantity  
385 and quality of diet that in turn contributes to having a better minimum dietary diversity score  
386 and nutritional status.

387 The odds of MDD score was more common among mothers found in medium and rich wealth  
388 indices. Mothers belonging to medium and rich socioeconomic status households were nearly  
389 six times and four times more likely to have minimum dietary diversity scores compared to poor  
390 socioeconomic status households respectively. This finding is consistent with previous results



391 in three countries (Bangladesh, Vietnam, and Ethiopia) [15], South Africa [16] and Ghana [13].  
392 The possible explanation behind this may be that as the socioeconomic status of the family  
393 increases, they would have stable food security status in case their probabilities of eating  
394 diversified food groups would also increase.

395 In summary, this finding will also support one of the strategic objectives of the National  
396 Nutrition Program II (NNP-II) in Ethiopia, which was launched to improve the nutritional status  
397 of women of reproductive age, including adolescent girls, pregnant women, and lactating  
398 mothers, through appropriate dietary diversity to alleviate the current burden of micronutrient  
399 deficiencies [22].

400 Regarding the strength and limitations of the study, the major strength of the current study is  
401 that using the newly recommended 10-point food group indicator, MDD-W, instead of the  
402 previous 9-point food group using a community-based cross-sectional study design was the  
403 limitation of other studies. However, recall bias was one of the limitations of the study since  
404 some of the questions we asked about the event that occurred 24 hours and 4 weeks back. This  
405 was minimized by probing the respondents about the event. Seasonal variation was also another  
406 limitation of the study. This study was also affected by reporting and social desirability bias.  
407 Therefore, this study could not reject the possibility of reporting bias from lactating mothers  
408 who did not eat. To minimize these biases lactating mothers were asked in a private setting.

## 409 **5. Conclusion**

410 Nearly half of the lactating mothers achieved the minimum dietary diversity score in the current  
411 study. Regarding the predictors of minimum dietary diversity score, attending formal education,  
412 having decision autonomy on the household purchase, having home gardening practice, having

413 good knowledge of nutrition, having illness in the last two weeks, being food secure household  
414 and being in medium and rich household wealth indices were the significant and independent  
415 predictors of minimum dietary diversity. Therefore, the government of Ethiopia, particularly the  
416 Ataye District Health Office, should be prioritizing, planning, designing and initiating dietary  
417 diversity intervention programs aimed at improving maternal nutrition through appropriate  
418 food-based approaches. Strengthen nutrition education programs on proper maternal MDD  
419 practices and adequate dietary intake during lactation to improve the nutrition outcomes of  
420 lactating mothers. Cooperatively work with health extension workers to increase the awareness  
421 of lactating mothers on how to improve the dietary diversity practice of mothers. Create strong  
422 multisectoral collaboration targeted at improving the mother's educational status, decision-  
423 making autonomy (women empowerment) and family socioeconomic status. District Health  
424 Extension Workers (HEWs) should also facilitate and promote nutrition education about dietary  
425 diversification for lactating mothers and the community at large. Educate mothers about visiting  
426 health service institutions when they become sick and about increasing their intake of varieties  
427 of food. Work in cooperation with developmental agents to increase the minimum dietary  
428 diversity score of lactating mothers in the District. Local NGOs should actively work in  
429 collaborating with the woreda health office to increase the awareness and knowledge of lactating  
430 mothers about food diversity and nutrition. Collaboratively work with another stakeholder to  
431 increase the stability of the HFS and socioeconomic status of the mother's family and the whole  
432 community to prevent inadequate DD practice of the mother's, thereby preventing poor  
433 nutritional status. Finally, the scientific community should study a different study design, such  
434 as a prospective cohort study design, that is recommended to address seasonal variability during  
435 the preharvest and postharvest seasons. Since dietary diversity is multifactorial and

436 multifaceted, further study is needed to identify other independent predictors for lactating  
437 mothers' dietary diversity.

#### 438 **Abbreviations**

439 DDS: Dietary Diversity Score

440 EDHS: Ethiopian Demographic and Health Survey

441 FAO: Food and Agricultural Organization of the United Nation

442 FANTA: Food and Nutrition Technical Assistant

443 HFIAS: Household Food Insecurity Access Scale

444 MDDS: Minimum Dietary Diversity Score

445 MDD-W: Minimum Dietary Diversity for Women

446 WHO: World Health Organization

#### 447 **Data Availability**

448 The data used to support the findings of this study are available from the corresponding author  
449 upon reasonable request.

#### 450 **Competing interests**

451 Authors are declared that they have no competing interests.

#### 452 **Disclosure**

453 This manuscript was prepared from the thesis work of Mr. Lemma Getacher. The cost of  
454 conducting this research was covered by him.

#### 455 **Author's contribution**

456 LG: - participated in the design of the study, performed the data collection, performed the  
457 statistical analysis and served as the lead author of the manuscript. GE: - participated in the  
458 design of the study, revised subsequent drafts of the paper and contributed to the finalization of

459 the manuscript. TA, AB, and AM: - participated in the design of the study, statistical analysis  
460 and finalization of the manuscript. All authors read and approved the final manuscript.

#### 461 **Acknowledgments**

462 We would like to express our deepest gratitude to Haramaya University, College of Health and  
463 Medical Science for ethical clearance. Our great thanks also deserve to our study participants,  
464 data collectors, supervisors and language translators for their invaluable contribution to this  
465 study.

#### 466 **References**

467 [1] USAID (United States Agency for Development). Maternal dietary diversity and the  
468 implications for children's diets in the context of food security. USAID 'S Infant and Young  
469 Child Nutrition Project. 2012. Available at: [http://iycn.wpengine.netdna-](http://iycn.wpengine.netdna-cdn.com/files/IYCN_Brief_Maternal_Dietary_Diversity0112.pdf)  
470 [cdn.com/files/IYCN\\_Brief\\_Maternal\\_Dietary\\_Diversity0112.pdf](http://iycn.wpengine.netdna-cdn.com/files/IYCN_Brief_Maternal_Dietary_Diversity0112.pdf) Accessed on 20,  
471 December 2017.

472 [2] Arimond, M., Wiesmann, D., Becquey, E., Alicia, C., Melissa, D., Megan, D. et al. Dietary  
473 diversity as a measure of the micronutrient adequacy of women's diets in resource-poor  
474 areas: Summary of results from five sites. Washington, DC: FANTA-2 Bridge, FHI360:14-  
475 15. 2011. Available at:  
476 [https://www.fantaproject.org/sites/default/files/resources/WDDP\\_Summary\\_Report\\_Jul20](https://www.fantaproject.org/sites/default/files/resources/WDDP_Summary_Report_Jul2011.pdf)  
477 [11.pdf](https://www.fantaproject.org/sites/default/files/resources/WDDP_Summary_Report_Jul2011.pdf) Accessed on November 21, 2017.

478 [3] FAO(Food and Agriculture Organization). Guidelines for measuring household and  
479 individual dietary diversity. FAO. Rome. 2011. Available at:

480 [http://agrobiodiversityplatform.org/files/2011/05/guidelines\\_MeasuringHousehold.pdf](http://agrobiodiversityplatform.org/files/2011/05/guidelines_MeasuringHousehold.pdf)

481 Accessed on December 21, 2018.

482 [4] FAO (Food and Agriculture Organization). Minimum Dietary Diversity for Women A Guide  
483 to Measurement. Rome. FAO and FANTA. 2016. Available at:  
484 <https://inddex.nutrition.tufts.edu/printpdf/160> Accessed on 21, December 2017.

485 [5] FAO (Food and Agriculture Organization) and FANTA (Food and Nutrition Technical  
486 Assistant). Introducing the Minimum Dietary Diversity–Women (MDD-W) Global Dietary  
487 Diversity Indicator for Women. FAO. Washington, DC. 2014. Available at:  
488 [https://www.fantaproject.org/sites/default/files/resources/Introduce-MDD-W-indicator-](https://www.fantaproject.org/sites/default/files/resources/Introduce-MDD-W-indicator-brief-Sep2014_0.pdf)  
489 [brief-Sep2014\\_0.pdf](https://www.fantaproject.org/sites/default/files/resources/Introduce-MDD-W-indicator-brief-Sep2014_0.pdf) Accessed on 21, December 2017.

490 [6] Hailelassie, K., Afework, M. and Meron, G. Feeding practices, nutritional status and  
491 associated factors of lactating women in Samre Woreda, South Eastern Zone of Tigray,  
492 Ethiopia. *Nutrition Journal*. 2013.12(28).

493 [7] Bailey, R. L., Keith, B. P., West, J. B. and Robert, E. B. The Epidemiology of Global  
494 Micronutrient Deficiencies. *Ann Nutr Metab*. 2015. 66(2): 22–33.

495 [8] Allemand, P. Reaching Consensus on a Global Dietary Diversity Indicator for Women,  
496 Washington, DC: 2014.1-6. Available at:  
497 [http://www.fao.org/fileadmin/templates/nutrition\\_assessment/Dietary\\_Diversity/AG2NUT](http://www.fao.org/fileadmin/templates/nutrition_assessment/Dietary_Diversity/AG2NUT_JULY30_ballard.pdf)  
498 [\\_JULY30\\_ballard.pdf](http://www.fao.org/fileadmin/templates/nutrition_assessment/Dietary_Diversity/AG2NUT_JULY30_ballard.pdf) Accessed on November 21, 2017.

499 [9] Martin-Prévela, Y., Allemanda, P., Wiesmannb, D., Arimond, M., Ballardd, T., Megan, D.  
500 et al. Moving forward on choosing a standard operational indicator of women’s dietary  
501 diversity. *FAO*. 2015. Available at: <https://cgspace.cgiar.org/bitstream/handle>

502 [/10568/72450/FAO\\_2015\\_MDD-W.PDF?sequence=1&isAllowed=y](#). Accessed on 21,  
503 December 2017.

504 [10] WHO (World Health Organization). Nutrition of women in the preconception period, during  
505 pregnancy and the breastfeeding period. Geneva, WHO. Geneva. 2012. Available at:  
506 [https://apps.who.int/iris/bitstream/handle/10665/78900/A65\\_12en.pdf?sequence=1&isAllowed=y](https://apps.who.int/iris/bitstream/handle/10665/78900/A65_12en.pdf?sequence=1&isAllowed=y)  
507 Accessed on 20, December 2017.

508 [11] IFPRI (International Food Policy Research Insititute). Global Nutrition Report 2015.  
509 Actions and accountability to advance nutrition & sustainable development. Washington,  
510 DC. 2015. Available at: <http://www.ifpri.org/publication/global-nutrition-report-2015>  
511 Accessed on 21, December 2017.

512 [12] CSA(Central Statistical Agency). Ethiopia Demographic and Health Survey 2016. CSA  
513 and ICF International. 2016. Addis Ababa, Ethiopia, and Rockville, Maryland, USA.  
514 Available at: <https://dhsprogram.com/pubs/pdf/FR328/FR328.pdf> Accessed on 21,  
515 December 2017

516 [13] Amugsi, D. A., Lartey, A., Kimani, E., and Mberu, B. U. Women's participation in  
517 household decision-making and higher dietary diversity: findings from nationally  
518 representative data from Ghana. *J Health Popul Nutr*. 2016. 35(1): 16.

519 [14] Henjum, S., Torheim, L. E., Thorne-Lyman, A. L., Chandyo, R., Fawzi, W. W.,  
520 Shrestha, P. S. et al. Low dietary diversity and micronutrient adequacy among lactating  
521 women in a peri-urban area of Nepal. *Public Health Nutr*. 2015.18(17): 3201-10.

- 522 [15] Nguyen, P. H., Avula, R., Ruel, M. T., Saha, K. K., Ali, D., Tran, L. M. et al. Maternal  
523 and child dietary diversity are associated with child dietary diversity in Bangladesh,  
524 Vietnam, and Ethiopia. *J Nutr.* 2013.143(7): 1176-83.
- 525 [16] Chakona, G. and Shackleton, C. Minimum Dietary Diversity Scores for Women Indicate  
526 Micronutrient Adequacy and Food Insecurity Status in South African Towns. *Nutrients.*  
527 2017.9(8).
- 528 [17] Ray, O., Wamani, H., and Bukenya, J. Factors associated with dietary diversity among  
529 women of reproductive age (15-49 years) in agago district. *Nurs Times.* 2014.1(2).
- 530 [18] Alemayehu, M., Alemayehu, A. and Abebe, G. Factors Associated with Malnutrition  
531 among Lactating Women in Subsistence Farming Households from Dedo and Seqa-  
532 Chekorsa Districts, Jimma Zone. *Developing Country Studies*, 2015. 5(21): 11-12.
- 533 [19] Sitotaw, I. K., Hailesslasie, K., and Adama, Y. Comparison of nutritional status and  
534 associated factors of lactating women between lowland and highland communities of  
535 District Raya, Alamata, Southern Tigray, Ethiopia. *BMC Nutrition.* 2017. 3(61).
- 536 [20] Weldehaweria, N. B., Misgina, K. H., Weldu, M. G., Gebregiorgis, Y. S., Gebrezgi, B.  
537 H., Zewdie, S. W. et al. Dietary diversity and related factors among lactating women visiting  
538 public health facilities in Aksum town, Tigray, Northern Ethiopia. *BMC Nutrition*, 2016.  
539 2(1): 10-12.
- 540 [21] Nair, M. K., Augustine, L. F. and Konapur, A. Food-Based interventions to Modify Diet  
541 Quality and Diversity to Address Multiple Micronutrient Deficiency. *Environmental Health,*  
542 *a section of the Journal of Frontiers in Public Health*, 2016. 3(277): 10-13.

- 543 [22] NNP II (National Nutrition Programme II). The government of the Federal Democratic  
544 Republic of Ethiopia National Nutrition Programme (NNP) 2016-2020. NNP Implementing  
545 Sectors' Declaration. 2016. Available at: [https://unicefethiopia.org/2016/12/20/new-](https://unicefethiopia.org/2016/12/20/new-national-nutrition-programme-ii-envisions-an-ethiopia-free-of-malnutrition/)  
546 [national-nutrition-programme-ii-envisions-an-ethiopia-free-of-malnutrition/](https://unicefethiopia.org/2016/12/20/new-national-nutrition-programme-ii-envisions-an-ethiopia-free-of-malnutrition/) Accessed on  
547 21, December 2017.
- 548 [23] CSA(Central Statistical Agency). 2008. Population and housing census atlas of Ethiopia:  
549 Central Statistical Agency. Available at: [http://www.csa.gov.et/census-report/complete-](http://www.csa.gov.et/census-report/complete-report/census-2007)  
550 [report/census-2007](http://www.csa.gov.et/census-report/complete-report/census-2007) Accessed on 21, December 2017
- 551 [24] Coates, J., Swindale, A. and Blinisky, P. Household Food Insecurity Access Scale  
552 (HFIAS) for Measurement of Food Access: Indicator Guide VERSION 3 Washington, D.C.:  
553 Food and Nutrition Technical Assistance Project, Academy for Educational Development.  
554 2007. [http://www.fao.org/fileadmin/user\\_upload/eufao-fsi4dm/doc-training/hfias.pdf](http://www.fao.org/fileadmin/user_upload/eufao-fsi4dm/doc-training/hfias.pdf)  
555 Accessed on 15, November 2017.
- 556 [25] Deitchle, M., Terri, B., Swindale, A. and Jennifer, C. Validation of a Measure of  
557 Household Hunger for Cross-Cultural Use. Washington, DC: Food and Nutrition Technical  
558 Assistance II Project (FANTA-2), AED. 2010. Available at  
559 [https://www.fantaproject.org/sites/default/files/resources/HHS\\_Validation\\_Report\\_May20](https://www.fantaproject.org/sites/default/files/resources/HHS_Validation_Report_May2010_0.pdf)  
560 [10\\_0.pdf](https://www.fantaproject.org/sites/default/files/resources/HHS_Validation_Report_May2010_0.pdf) accessed on November 30, 2017.
- 561 [26] Hagos, S., Lunde, T., Damen, H., Tasew, W. and Lindtjorn, B. Is the adapted Household  
562 Food Insecurity Access Scale (HFIAS) developed internationally to measure food insecurity  
563 valid in urban and rural households of Ethiopia?, *BMC Nutrition*, 2015. 1(2).



564 [27] Ongosi, A. N., Gericke, G., Mbutia , E. and Oelofse, A. Food variety, dietary diversity,  
565 and perceived hunger among lactating women (0-6 months postpartum) in a low socio-  
566 economic area in Nairobi, Kenya. *African Journal of Food, Agriculture, Nutrition and*  
567 *Development*, 2014.14(2).
